## Evolution of left ventricular function after Wharton's jelly mesenchymal stem cells transcatheter administration: 5-year follow up in a pilot cohort of CIRCULATE-AMI Randomized Trial

E. Kwicien<sup>1</sup>, L. Drabik<sup>2</sup>, A. Mazurek<sup>1</sup>, M. Sikorska<sup>1</sup>, L. Czyz<sup>1</sup>, M. Skubera<sup>1</sup>, M. Urbanczyk<sup>3</sup>, W. Szot<sup>4</sup>, M. Kostkiewicz<sup>5</sup>, R.P. Banys<sup>3</sup>, W. Plazak<sup>1</sup>, M. Olszowska<sup>1</sup>, M. Majka<sup>6</sup>, P. Podolec<sup>1</sup>, P. Musialek<sup>1</sup>

<sup>1</sup>Jagiellonian University, John Paul II Hospital, Dept of Cardiac & Vascular Diseases, Krakow, Poland; <sup>2</sup>Jagiellonian University, Department of Pharmacology, John Paul II Hospital, Dept of Cardiac & Vascular Diseases, Krakow, Poland; <sup>3</sup>John Paul II Hospital, Dept of Radiology, Magnetic Resonance Imaging Laboratory, Krakow, Poland; <sup>4</sup>John Paul II Hospital, Department of Nuclear Medicine, Krakow, Poland; <sup>5</sup>Jagiellonian University, John Paul II Hospital, Dept of Cardiac & Vascular Diseases, Dept Nuclear Medicine, Krakow, Poland; <sup>6</sup>Jagiellonian University, Dept of Transplantation, Krakow, Poland

On behalf of CIRCULATE

**Funding Acknowledgement:** Type of funding source: Public grant(s) – National budget only. Main funding source(s): STRATEGMED 265761 “CIRCULATE” National Centre for Research and Development/Poland/ZDS/00564 Jagiellonian University Medical College

**Introduction:** CIRCULATE-Acute Myocardial Infarction is a double-blind controlled trial randomizing (RCT) in 105 consecutive patients with their first, large AMI (cMRI-LVEF  $\leq 45\%$  and/or cMRI-infarct size  $\geq 10\%$  of LV) with successful infarct-related artery (IRA) primary percutaneous coronary intervention (pPCI) to transcatheter administration of Wharton's Jelly Mesenchymal Stem Cells (WJMSCs) vs. placebo (2:1). The pilot study cohort (PSC) preceded the RCT.

**Aim:** To evaluate WJMSCs long-term safety, and evolution of left-ventricular (LV) function in CIRCULATE-AMI PSC.

**Material and methods:** 30 000 000 WJMSCs (50% labelled with 99mTc-exametazime) were administered via IRA in a ten-patient PCS (age 32–65 years, peak hs-Troponin T  $17.3 \pm 9.1$  ng/mL and peak CK-MB  $533 \pm 89$  U/L, cMRI-LVEF  $40.3 \pm 2.7\%$  and infarct size  $20.1 \pm 2.8\%$ ) at  $\approx 5$ –7 days after AMI using a cell delivery-dedicated, coronary-non-occlusive method. Other treatments were per guidelines.

WJMSCs showed an unprecedented high myocardial uptake ( $30.2 \pm 5.3\%$ ; 95% CI 26.9–33.5%), corresponding to  $\approx 9 \times 10^6$  cells retention in the infarct zone – in absence of epicardial flow or myocardial perfusion impairment (TIMI-3 in all; cTFC  $45 \pm 8$  vs.  $44 \pm 9$ ,  $p=0.51$ ) or any hs-Troponin T elevation. Five-year follow up included cardiac Magnetic Resonance Imag-

ing (cMRI) (at baseline, 1 year and 3 years) and detailed echocardiography (echo) at baseline, 1 year, 3 years and 5 years.

**Results:** By 5 years, one patient died from a new, non-index territory AMI. There were no other cardiovascular events and MACCE that might be related to WJMSCs transplantation.

On echo (Fig), there was an increase in left ventricular ejection fraction (LVEF) between WJMSCs administration point and 1 year ( $37.7 \pm 2.9\%$  vs.  $48.3 \pm 2.5\%$ ,  $p=0.002$ ) that was sustained at 3 years ( $47.2 \pm 2.6\%$ ,  $p=0.005$  vs. baseline) and at 5 years: ( $44.7 \pm 3.2\%$ ,  $p=0.039$  vs. baseline). LVEF reached a peak at 1 year after the AMI and WJMSCs transfer (Fig). cMRI data (obtained up to 3 years; 1 year  $41.9 \pm 2.6\%$  vs.  $51.0 \pm 3.3\%$ ,  $p < 0.01$ ; 3 years  $52.2 \pm 4.0\%$ ,  $p < 0.01$  vs. baseline) were consistent with the echo LVEF assessment.

**Conclusions:** 5-year follow up in CIRCULATE-AMI PSC indicates that WJMSC transcatheter application is safe and may be associated with an LVEF improvement. The magnitude of LV increase appears to peak at 1 year, suggesting a potential role for repeated WJMSCs administration(s). Currently running double-blind RCT will provide placebo-controlled insights into the WJMSCs effect(s) on changes in LV function, remodelling, scar reduction and clinical outcomes.

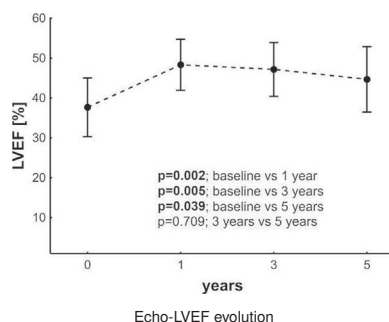

Source: http://academic.oup.com/eurheartj/article-pdf/41/Supplement_2/ehaa946.1719/34517048/ehaa946.1719.pdf
